# Supplementary material
Source: Springer Nature journal article supplement (https://www.springermedizin.de/resource/supplementary/12884_2012_564_MOESM3_ESM.pdf/9458064)
Supplement: MOESM3 [file 9458064]

## Confirmatory Exam for Congenital Abnormality by Specialist

*If more than one baby fill a separate sheet for each baby (A, B, C for each child born - in order of birth)*

|                             |                                    |
|-----------------------------|------------------------------------|
| Mother's Hospital ID: _____ | Mother's Registry ID Code: _____   |
| Mother's Initials: _____    | Mother's DOB/Age: _____            |
| Baby's Hospital ID: _____   | Baby's Registry ID Code: _____     |
| Place of Delivery: _____    | Place of Initial Assessment: _____ |
| DOB of infant: _____        | Date of Examination: _____         |

### Assessment of the new born (or stillborn baby) (Take photo if abnormalities detected)

Weight (g) \_\_\_\_\_ Supine length (cm): \_\_\_\_\_ Head Circumference (cm): \_\_\_\_\_  
 Heart rate (per minute): \_\_\_\_\_ Respiratory rate (per minute): \_\_\_\_\_

**Reason for Referral of Child for Examination:**

**Pertinent History:**

| Examination Findings: | If Abnormal, Please describe: |
|-----------------------|-------------------------------|
|                       |                               |
|                       |                               |
|                       |                               |
|                       |                               |
|                       |                               |
|                       |                               |
|                       |                               |
|                       |                               |
|                       |                               |
|                       |                               |
|                       |                               |
|                       |                               |
|                       |                               |
|                       |                               |
|                       |                               |
|                       |                               |
|                       |                               |
|                       |                               |
|                       |                               |
|                       |                               |
|                       |                               |
|                       |                               |
|                       |                               |

**Summary of examination findings:**

**Recommendations:**

### Clinician's Details:

Name of examining doctor: \_\_\_\_\_ Qualification: \_\_\_\_\_

Are you aware of the medicines taken by the mother during pregnancy?

|     |    |          |
|-----|----|----------|
| Yes | No | Not Sure |
|-----|----|----------|

Facility Name: \_\_\_\_\_

Telephone: \_\_\_\_\_ Email: \_\_\_\_\_ Fax: \_\_\_\_\_

Signature \_\_\_\_\_ Date of report: \_\_\_\_\_

Photograph of congenital anomaly provided? 

|     |    |
|-----|----|
| Yes | No |
|-----|----|

\* Attach photograph to form -record ID code and clinic name with the photo
